# Supplementary material for: The Role of Monk Parakeets as Nest-Site Facilitators in Their Native and Invaded Areas
Source: MDPI journal article supplement (doi:10.3390/biology10070683), 2021-07-19
Supplement: s1 [file s1]

**Table S2.** Alternative models (i.e., models  $\Delta AICc < 2$ ) obtained to compare the proportion of monk parakeets with tenant species, the abundance and richness of tenants, as well as the persistence (i.e., years that a nest remained occupied) of tenants at monk parakeet nests.

| Presence of tenants   |                 |          |            |         |          |
|-----------------------|-----------------|----------|------------|---------|----------|
| Models                | Variables       | Estimate | SE         | z value | p        |
| A + B + C + D + E     | (Intercept)     | -1.82027 | 0.32718    | -5.563  | 2.64e-08 |
|                       | A               | 22.61738 | 2903.28357 | 0.008   | 0.9938   |
|                       | B               | 1.59162  | 0.09466    | 16.813  | < 2e-16  |
|                       | C (urban)       | -1.39399 | 0.33566    | -4.153  | 3.28e-05 |
|                       | D (Puerto Rico) | 3.13453  | 0.32259    | 9.717   | < 2e-16  |
|                       | D (C. Spain)    | 2.94282  | 0.36235    | 8.121   | 4.60e-16 |
|                       | D (Tenerife)    | 1.26833  | 0.63091    | 2.01    | 0.0444   |
|                       | E (Roof)        | 3.88229  | 0.66525    | 5.836   | 5.35e-09 |
|                       | E (Tree)        | -0.66036 | 0.34939    | -1.89   | 0.0588   |
|                       |                 |          |            |         |          |
| A + B + C + D + E + F | (Intercept)     | -1.83075 | 0.32964    | -5.554  | 2.79e-08 |
|                       | A               | 23.16831 | 3826.98956 | 0.006   | 0.9952   |
|                       | B               | 1.58862  | 0.09524    | 16.681  | < 2e-16  |
|                       | C (urban)       | -1.39713 | 0.33603    | -4.158  | 3.21e-05 |
|                       | F               | 0.01787  | 0.06688    | 0.267   | 0.7894   |
|                       | D (Puerto Rico) | 3.14835  | 0.32681    | 9.634   | < 2e-16  |
|                       | D (C. Spain)    | 2.94534  | 0.36261    | 8.123   | 4.56e-16 |
|                       | D (Tenerife)    | 1.2772   | 0.63191    | 2.021   | 0.0433   |
|                       | E (Roof)        | 3.91614  | 0.67751    | 5.78    | 7.46e-09 |
|                       | E (Tree)        | -0.65005 | 0.35152    | -1.849  | 0.0644   |
| Abundance of tenants  |                 |          |            |         |          |
| Models                | Variables       | Estimate | SE         | z value | p        |
| A + B + C + D + E     | (Intercept)     | -0.93586 | 0.15224    | -6.147  | 7.88e-10 |
|                       | A               | 1.54357  | 0.13083    | 11.798  | < 2e-16  |
|                       | B               | 0.86922  | 0.04021    | 21.618  | < 2e-16  |
|                       | C (urban)       | -0.97081 | 0.14168    | -6.852  | 7.27e-12 |
|                       | D (Puerto Rico) | 1.80033  | 0.188      | 9.576   | < 2e-16  |
|                       | D (C. Spain)    | 1.67379  | 0.15455    | 10.83   | < 2e-16  |

|                       |                       |             |           |          |          |
|-----------------------|-----------------------|-------------|-----------|----------|----------|
| A + B + C + F + D + E | D (Tenerife)          | 0.61023     | 0.38449   | 1.587    | 0.112    |
|                       | E (Roof)              | 1.39809     | 0.35578   | 3.93     | 8.51e-05 |
|                       | E (Tree)              | -0.68237    | 0.15631   | -4.365   | 1.27e-05 |
|                       | (Intercept)           | -0.94112    | 0.15248   | -6.172   | 6.74e-10 |
|                       | A                     | 1.53552     | 0.132     | 11.633   | < 2e-16  |
|                       | B                     | 0.86718     | 0.04033   | 21.504   | < 2e-16  |
|                       | C (urban)             | -0.96275    | 0.14275   | -6.744   | 1.54e-11 |
|                       | F                     | 0.01695     | 0.04033   | 0.42     | 0.674    |
|                       | D (Puerto Rico)       | 1.80999     | 0.18917   | 9.568    | < 2e-16  |
|                       | D (C. Spain)          | 1.66621     | 0.15534   | 10.726   | < 2e-16  |
|                       | D (Tenerife)          | 0.60911     | 0.38417   | 1.586    | 0.113    |
|                       | E (Roof)              | 1.41671     | 0.35792   | 3.958    | 7.55e-05 |
|                       | E (Tree)              | -0.6777     | 0.15638   | -4.334   | 1.47e-05 |
| <hr/>                 |                       |             |           |          |          |
| Richness of tenants   |                       |             |           |          |          |
| Models                | Variables             | Estimate    | SE        | z value  | p        |
| A + B + C + D + E     | (Intercept)           | -1.76624    | 0.14849   | -11.894  | < 2e-16  |
|                       | A                     | 1.07473     | 0.11225   | 9.574    | < 2e-16  |
|                       | B                     | 0.32126     | 0.01639   | 19.598   | < 2e-16  |
|                       | C (urban)             | -0.85258    | 0.12596   | -6.769   | 1.30e-11 |
|                       | D (Puerto Rico)       | 1.20487     | 0.17611   | 6.841    | 7.84e-12 |
|                       | D (C. Spain)          | 1.43272     | 0.14757   | 9.709    | < 2e-16  |
|                       | D (Tenerife)          | 1.79366     | 0.2417    | 7.421    | 1.16e-13 |
|                       | E (Roof)              | 1.93722     | 0.29746   | 6.513    | 7.39e-11 |
|                       | E (Tree)              | 0.18719     | 0.13433   | 1.394    | 0.163    |
|                       | A + B + C + F + D + E | (Intercept) | -1.766265 | 0.148498 | -11.894  |
| A                     |                       | 1.075947    | 0.113035  | 9.519    | < 2e-16  |
| B                     |                       | 0.321217    | 0.016396  | 19.591   | < 2e-16  |
| C (urban)             |                       | -0.854079   | 0.127033  | -6.723   | 1.78e-11 |
| F                     |                       | -0.003371   | 0.036853  | -0.091   | 0.927    |
| D (Puerto Rico)       |                       | 1.20268     | 0.177713  | 6.768    | 1.31e-11 |
| D (C. Spain)          | 1.434358              | 0.148655    | 9.649     | < 2e-16  |          |

|                           | D (Tenerife) | 1.79405  | 0.241755 | 7.421   | 1.16e-13 |
|---------------------------|--------------|----------|----------|---------|----------|
|                           | E (Roof)     | 1.934079 | 0.299391 | 6.46    | 1.05e-10 |
|                           | E (Tree)     | 0.187236 | 0.134338 | 1.394   | 0.163    |
| Persistence of tenants    |              |          |          |         |          |
| Models                    | Variables    | Estimate | SE       | z value | p        |
| G + A + B + C + F + D + E | (Intercept)  | 4.23816  | 1.10091  | 3.85    | 0.000118 |
|                           | G            | -8.06706 | 0.4879   | -16.534 | < 2e-16  |
|                           | A            | 2.05852  | 0.56596  | 3.637   | 0.000276 |
|                           | B            | 9.9667   | 0.53242  | 18.72   | < 2e-16  |
|                           | C (urban)    | -5.83022 | 1.6697   | -3.492  | 0.00048  |
|                           | F            | -0.43353 | 0.08053  | -5.383  | 7.31e-08 |
|                           | D (Seville)  | 0.19793  | 0.15204  | 1.302   | 0.192985 |
|                           | D (Tenerife) | 0.16061  | 0.22823  | 0.704   | 0.48159  |
|                           | E (Tree)     | 0.92755  | 1.44476  | 0.642   | 0.520869 |
|                           |              |          |          |         |          |
| G + A + B + C + F + D     | (Intercept)  | 4.40145  | 1.07191  | 4.106   | 4.02e-05 |
|                           | G            | -8.07019 | 0.48789  | -16.541 | < 2e-16  |
|                           | A            | 2.01843  | 0.55797  | 3.617   | 0.000298 |
|                           | B            | 9.96988  | 0.53242  | 18.726  | < 2e-16  |
|                           | C (urban)    | -5.06737 | 1.0721   | -4.727  | 2.28e-06 |
|                           | F            | -0.43285 | 0.08045  | -5.38   | 7.43e-08 |
|                           | D (Seville)  | 0.2004   | 0.15194  | 1.319   | 0.187196 |
|                           | D (Tenerife) | 0.163    | 0.22816  | 0.714   | 0.474972 |

A: Abandoned nest (i.e., without presence of monk parakeets)

B: nest size (i.e., number of chambers)

C: habitat type (urban/rural)

D: population (South America, Puerto Rico, Continental Spain, and Tenerife) or (Seville, Madrid, and Tenerife)

E: substrate (tree, pylon, roof)

F: height above ground level

G: number of monk parakeets in the colony
