# Supplementary material for: The Role of Monk Parakeets as Nest-Site Facilitators in Their Native and Invaded Areas
Source: MDPI journal article supplement (doi:10.3390/biology10070683), 2021-07-19
Supplement: s1 [file s1]

**Table S1.** Post-hoc test (including Bonferroni's correction) comparing the proportion of monk parakeets with tenant species, as well as its abundance and richness in the different monitored populations.

| <b>Presence of tenants</b>  |                   |           |           |               |          |
|-----------------------------|-------------------|-----------|-----------|---------------|----------|
| <b>contrast</b>             | <b>odds.ratio</b> | <b>SE</b> | <b>df</b> | <b>t-test</b> | <b>p</b> |
| Puerto Rico/South America   | 21.72             | 6.86      | 1965      | 9.74          | <0.0001  |
| C. Spain/South America      | 51.53             | 16.24     | 1965      | 12.51         | <0.0001  |
| C. Spain/Puerto Rico        | 2.37              | 0.77      | 1965      | 2.67          | 0.0463   |
| Tenerife/South America      | 17.45             | 9.09      | 1965      | 5.49          | <0.0001  |
| Tenerife/Puerto Rico        | 0.80              | 0.43      | 1965      | -0.41         | 1.0000   |
| Tenerife/C. Spain           | 0.34              | 0.14      | 1965      | -2.55         | 0.0657   |
| <b>Abundance of tenants</b> |                   |           |           |               |          |
| <b>contrast</b>             | <b>ratio</b>      | <b>SE</b> | <b>df</b> | <b>t-test</b> | <b>p</b> |
| Puerto Rico/South America   | 6.05              | 1.14      | 1962      | 9.58          | <0.0001  |
| C. Spain/South America      | 5.33              | 0.82      | 1962      | 10.83         | <0.0001  |
| C. Spain/Puerto Rico        | 0.88              | 0.16      | 1962      | -0.70         | 1.0000   |
| Tenerife/South America      | 1.84              | 0.71      | 1962      | 1.59          | 0.6759   |
| Tenerife/Puerto Rico        | 0.30              | 0.12      | 1962      | -3.01         | 0.0157   |
| Tenerife/C. Spain           | 0.35              | 0.12      | 1962      | -3.02         | 0.0153   |
| <b>Richness of tenants</b>  |                   |           |           |               |          |
| <b>contrast</b>             | <b>ratio</b>      | <b>SE</b> | <b>df</b> | <b>t-test</b> | <b>p</b> |
| Puerto Rico/South America   | 3.34              | 0.59      | 1963      | 6.84          | <0.0001  |
| C. Spain/South America      | 4.19              | 0.62      | 1963      | 9.71          | <0.0001  |
| C. Spain/Puerto Rico        | 1.26              | 0.22      | 1963      | 1.31          | 1.0000   |
| Tenerife/South America      | 6.01              | 1.45      | 1963      | 7.42          | <0.0001  |
| Tenerife/Puerto Rico        | 1.80              | 0.46      | 1963      | 2.30          | 0.1296   |
| Tenerife/C. Spain           | 1.43              | 0.27      | 1963      | 1.89          | 0.3515   |
