# Supplementary material for: The Role of Monk Parakeets as Nest-Site Facilitators in Their Native and Invaded Areas
Source: Biology (Basel). 2021 Jul 19;10(7):683. doi: 10.3390/biology10070683 (PMC8301312; doi:10.3390/biology10070683)
Supplement: Supplementary file 1 [file biology-10-00683-s001.zip]

Archive with 4 entries (4 files):
- FigureS1.pdf
- FigureS2.pdf
- TableS1.pdf
- TableS2.pdf
